# Supplementary material for: Structure, intermolecular interactions, and dynamic properties of NTO crystals with impurity defects: a computational study
Source: Royal Society of Chemistry journal article supplement (doi:10.1039/d0ce01670e), 2021-01-01
Supplement: d0ce01670e1.pdf [file d0ce01670e1.pdf]

## Supporting Information

### Structure, intermolecular interactions, and dynamic properties of NTO crystal with impurity defects: A computational study

Jincheng Ji, Kun Wang, Simin, Zhu and Weihua Zhu\*

*Institute for Computation in Molecular and Materials Science, School of Chemical Engineering, Nanjing University of Science and Technology, Nanjing 210094,*

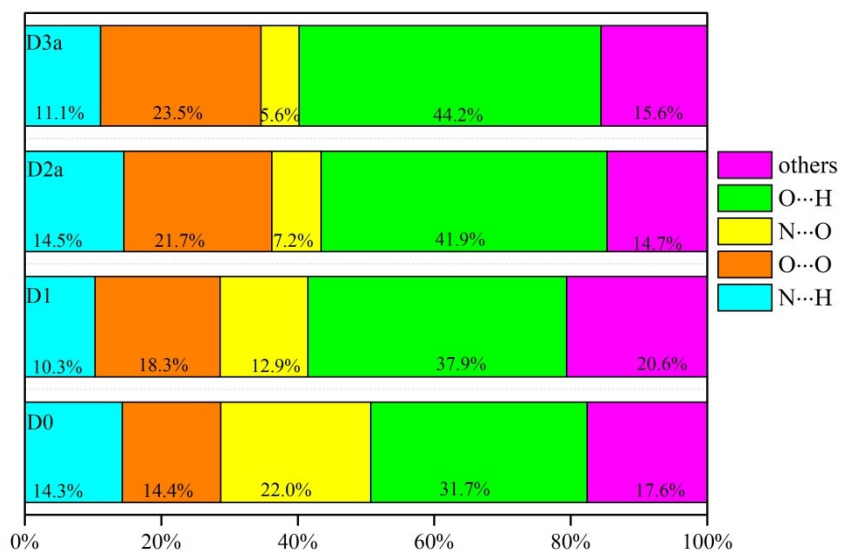

**Fig. S1** Contact distribution of the NTO molecules in the ideal and impurity-contained NTO crystals.



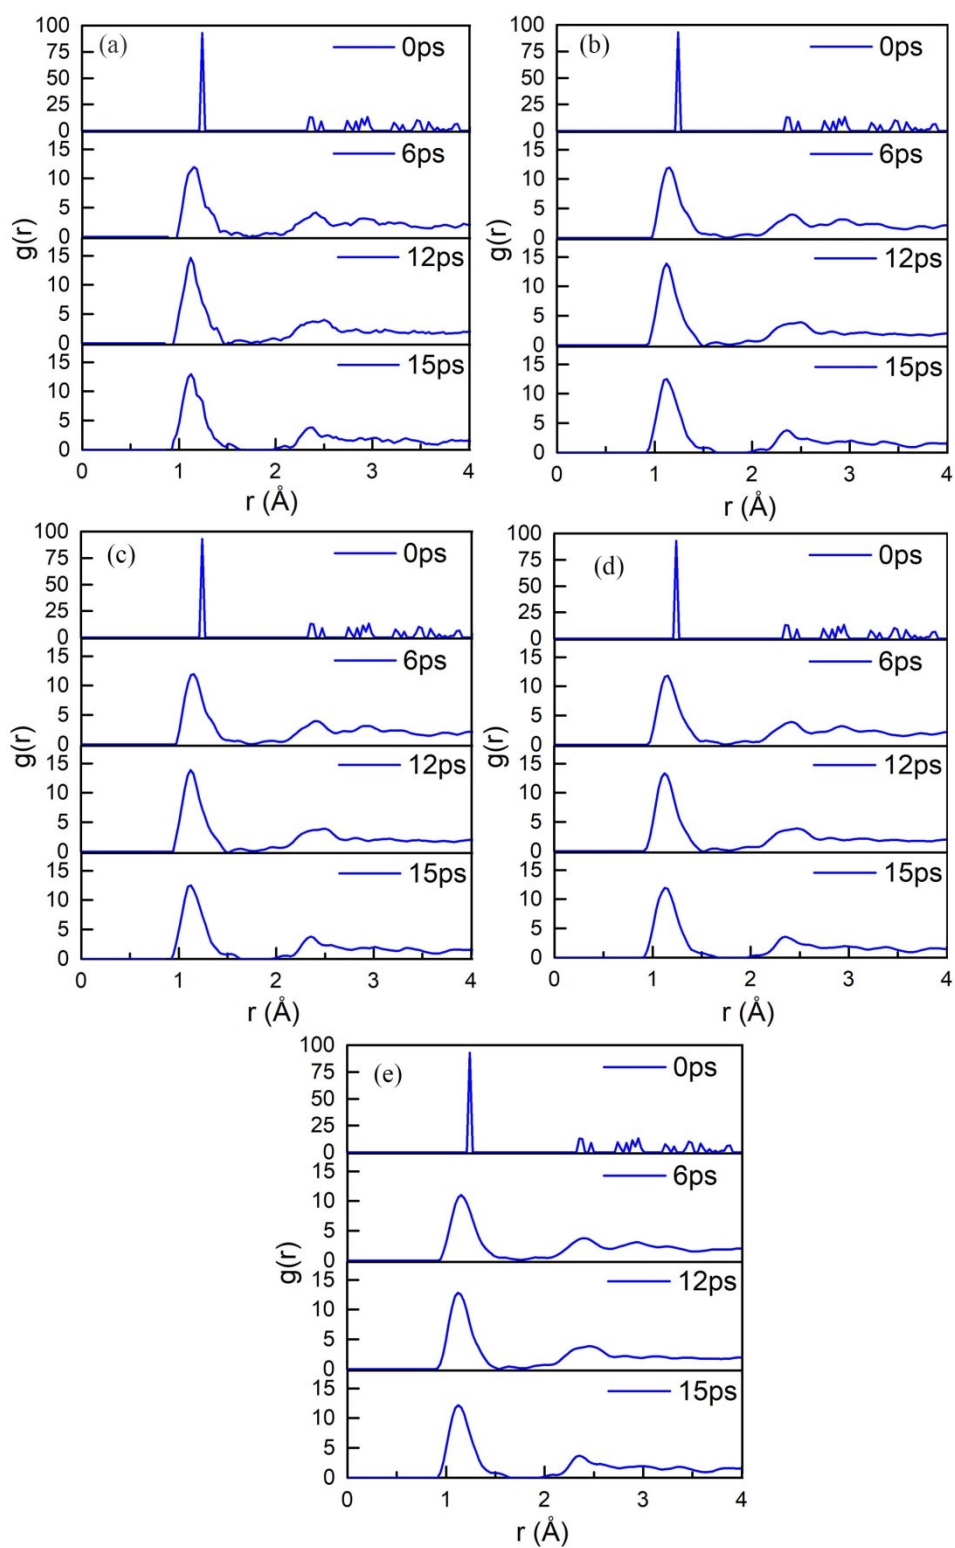

**Fig. S2** The RDFs of the D0 model from the five MD simulations
